# Supplementary material for: Novel Hybrid Conductor of Irregularly Patterned Graphene Mesh and Silver Nanowire Networks
Source: MDPI journal article supplement (doi:10.3390/mi11060578), 2020-06-09
Supplement: s1 [file s1]

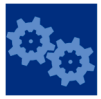

# Novel Hybrid Conductor of Irregularly Patterned Graphene Mesh and Silver Nanowire Networks

Hiesang Sohn, Weon Ho Shin, Dohyeong Seok, Taek Lee, Chulhwan Park, Jong-Min Oh, Se Yun Kim and Anusorn Seubsai

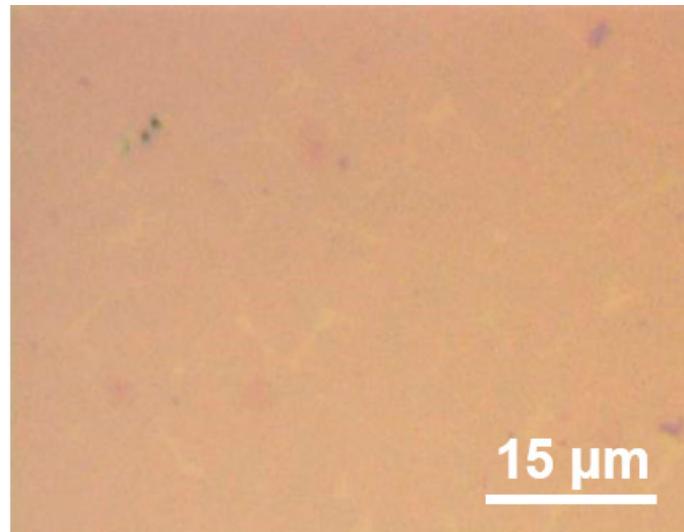

**Figure S1.** Digital photo-image of pristine graphene nanosheet.
